# Supplementary material
Source: PubMed Central journal article supplement (PMC7544655)

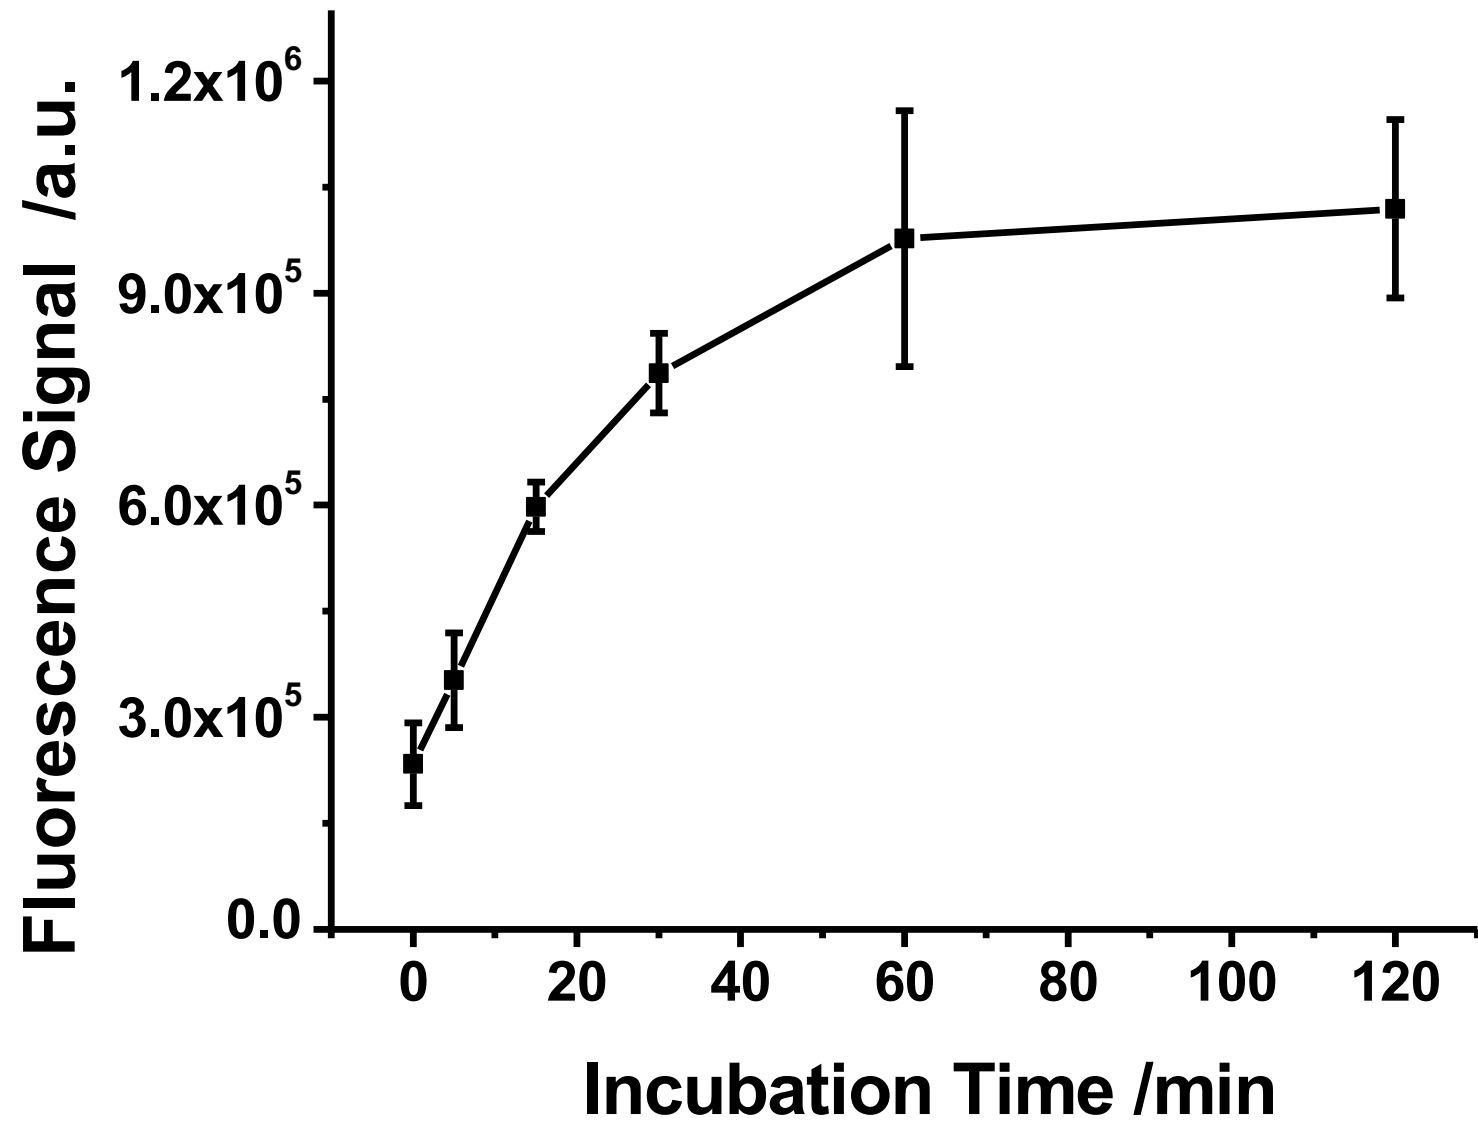

Supplement: NIHMS1619381-supplement-1.pdf [file NIHMS1619381-supplement-1.pdf]

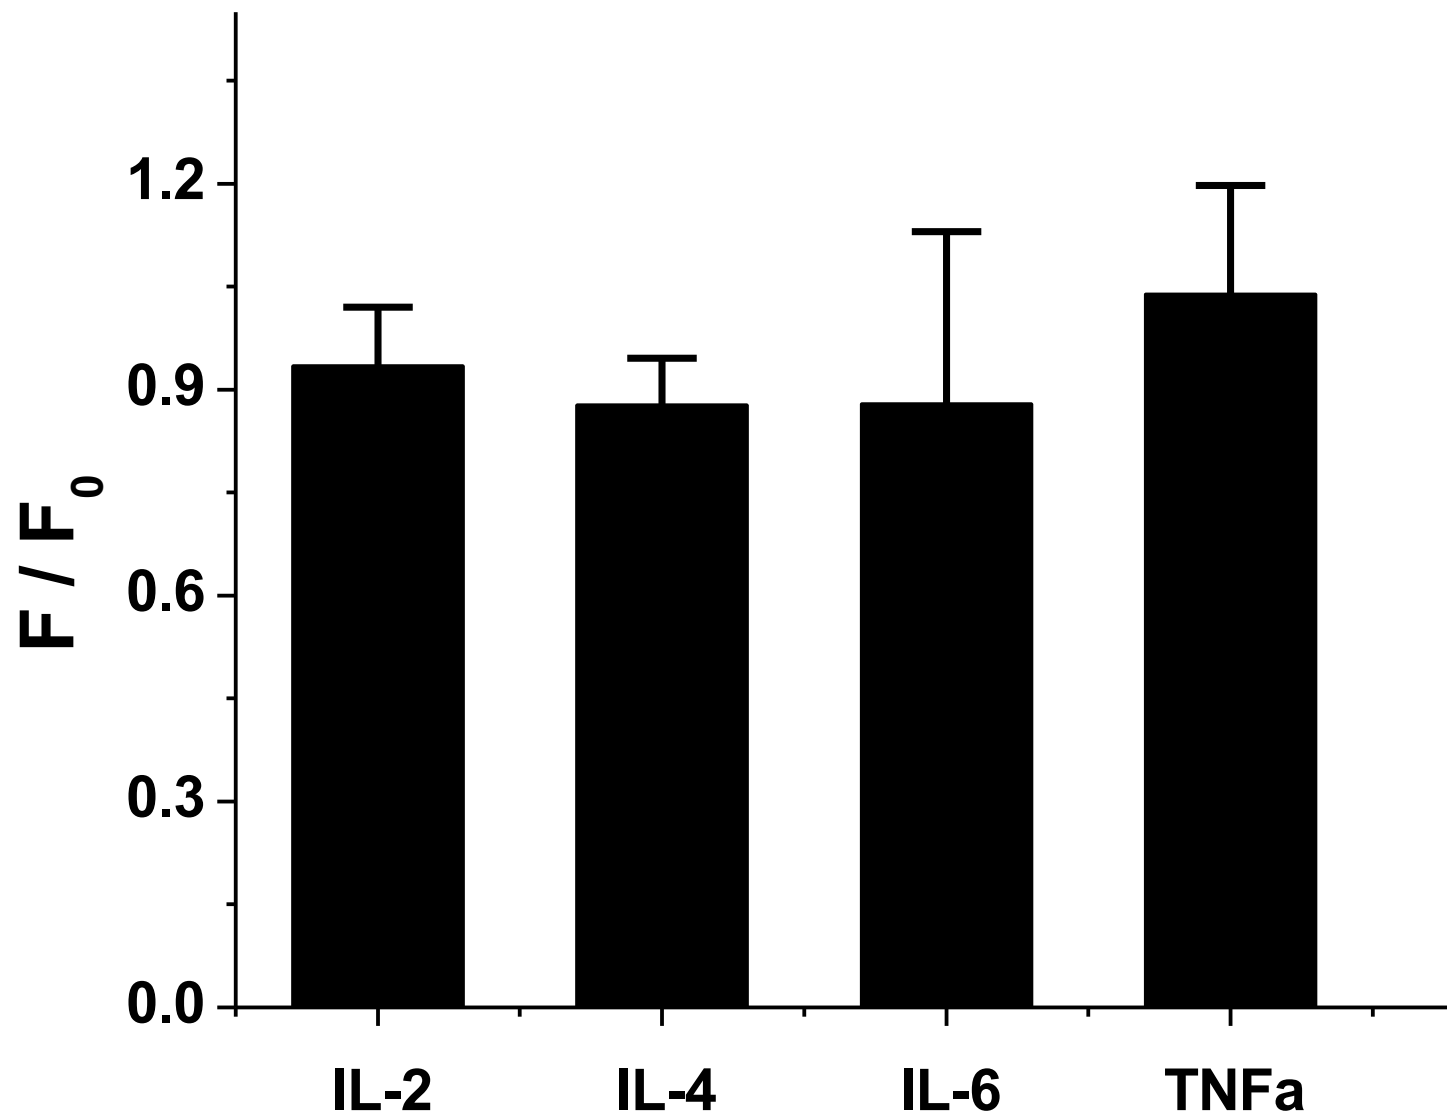

Supplement: NIHMS1619381-supplement-2.pdf [file NIHMS1619381-supplement-2.pdf]

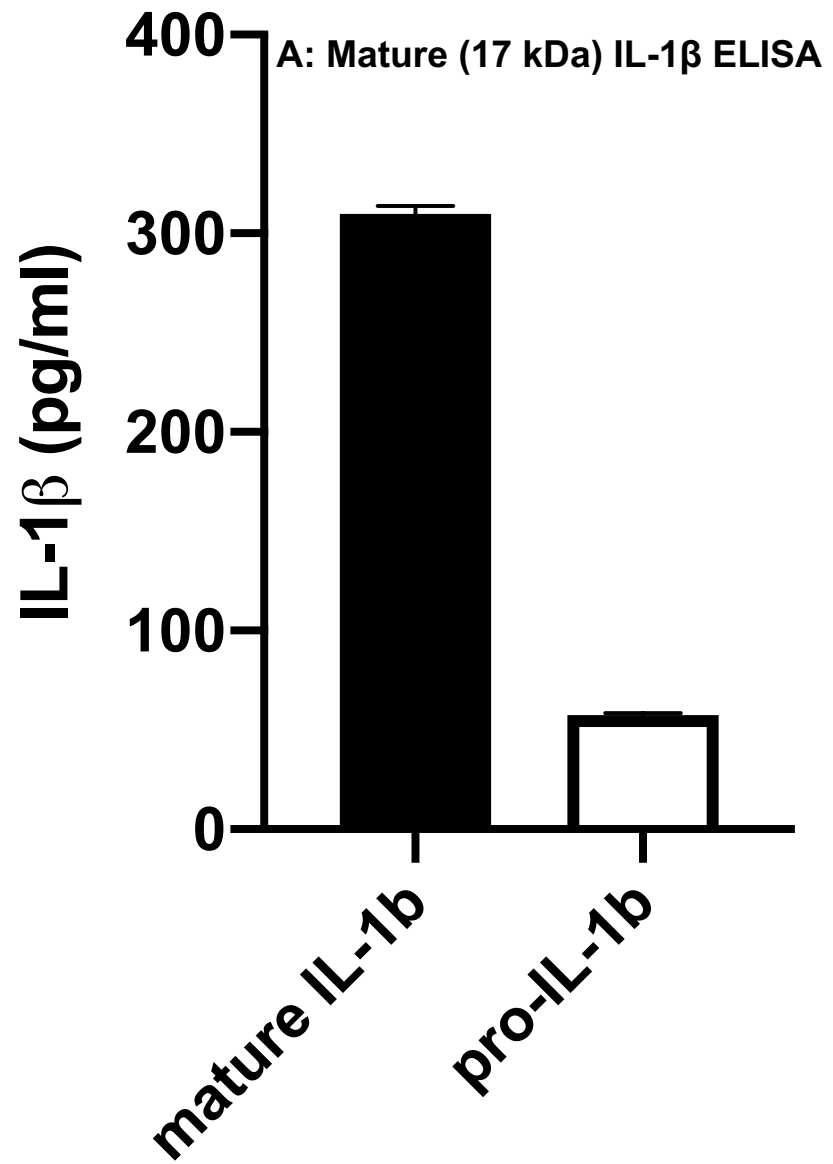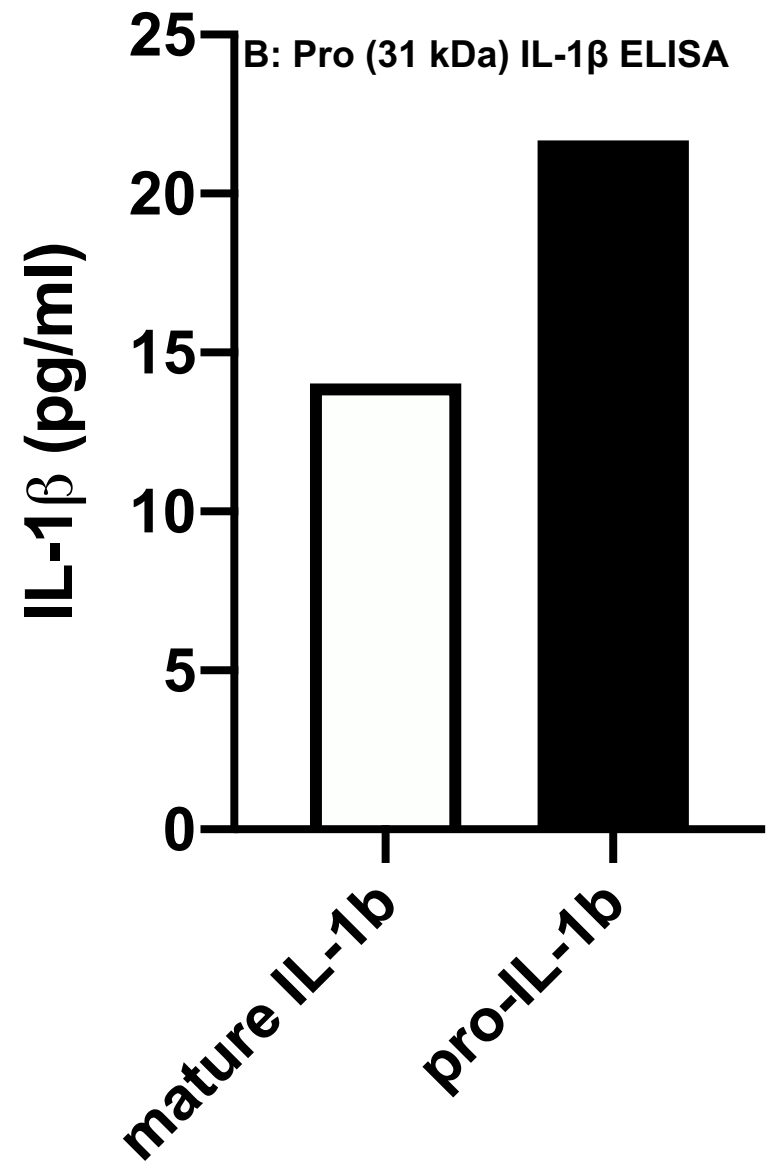

Supplement: NIHMS1619381-supplement-3.pdf [file NIHMS1619381-supplement-3.pdf]
